## Ceftazidime/avibactam in the era of carbapenemase-producing *Klebsiella pneumoniae*: experience from a national registry study

I. Karaiskos<sup>1\*</sup>†, G. L. Daikos<sup>2†</sup>, A. Gkoufa<sup>2</sup>, G. Adamis<sup>3</sup>, A. Stefos<sup>4</sup>, S. Symbardi<sup>5</sup>, G. Chrysos<sup>6</sup>, E. Filiou<sup>7</sup>, D. Basoulis<sup>2</sup>, E. Mouloudi<sup>8</sup>, L. Galani<sup>1</sup>, K. Akinosoglou<sup>9</sup>, K. Arvaniti<sup>10</sup>, A. Masgala<sup>11</sup>, M. Petraki<sup>12</sup>, E. Papadimitriou<sup>13</sup>, I. Galani<sup>14</sup>, G. Poulakou<sup>15</sup>, C. Routsis<sup>16</sup> and H. Giamarellou<sup>1</sup> on behalf of the Hellenic Ceftazidime/Avibactam Registry Study Group‡

<sup>1</sup>Hygeia General Hospital, 1st Department of Internal Medicine - Infectious Diseases, Athens, Greece; <sup>2</sup>Laiko General Hospital, 1st Department of Medicine, School of Medicine, National and Kapodistrian University of Athens, Athens, Greece; <sup>3</sup>Peripheral General Hospital Athens Giorgos Gennimatas, 1st Department of Internal Medicine and Infectious Diseases Unit, Athens, Greece; <sup>4</sup>University of Thessaly, Larissa, Department of Medicine and Research Laboratory of Internal Medicine, Larissa, Greece; <sup>5</sup>Thriaseio Geniko Nosokomeio Elefsinas, 1st Department of Internal Medicine, Magoula of Elefsina, Athens, Greece; <sup>6</sup>Peripheral General Hospital of Peiraias Tzaneio, 2nd Department of Internal Medicine and Infectious Diseases Unit, Athens, Greece; <sup>7</sup>Sotiria General Hospital of Chest Diseases of Athens, Intensive Care Unit, 1st Department of Respiratory Medicine, Athens, Greece; <sup>8</sup>Ippokrateio General Hospital of Thessaloniki, Intensive Care Unit, Thessaloniki, Greece; <sup>9</sup>University of Patras, Department of Medicine, Medical School, Patras, Greece; <sup>10</sup>Geniko Nosokomeio Thessalonikis Papageorgiou, Intensive Care Unit and Antimicrobial Stewardship Unit, Thessaloniki, Greece; <sup>11</sup>Konstantopouleio General Hospital Neas Ionias Patesion, 1st Department of Internal Medicine, Athens, Greece; <sup>12</sup>Mediterraneo Hospital, Intensive Care Unit, Athens, Greece; <sup>13</sup>General Hospital of Lamia, Department of Internal Medicine, Lamia, Greece; <sup>14</sup>National and Kapodistrian University of Athens Faculty of Medicine, Infectious Diseases Laboratory, 4th Department of Internal Medicine, Athens, Greece; <sup>15</sup>Sotiria General Hospital of Chest Diseases of Athens, 3rd Department of Internal Medicine, National and Kapodistrian University of Athens, Medical School, Athens, Greece; <sup>16</sup>Evaggelismos Hospital, Intensive Care Unit, School of Medicine, National and Kapodistrian University of Athens, Athens, Greece

\*Corresponding author. E-mail: ikaraiskos@hygeia.gr

†These authors contributed equally to the work.

‡Other members are listed in the Acknowledgements section.

Received 31 August 2020; accepted 6 November 2020

**Background:** Infections caused by KPC-producing *Klebsiella pneumoniae* (Kp) are associated with high mortality. Therefore, new treatment options are urgently required.

**Objectives:** To assess the outcomes and predictors of mortality in patients with KPC- or OXA-48-Kp infections treated with ceftazidime/avibactam with an emphasis on KPC-Kp bloodstream infections (BSIs).

**Methods:** A multicentre prospective observational study was conducted between January 2018 and March 2019. Patients with KPC- or OXA-48-Kp infections treated with ceftazidime/avibactam were included in the analysis. The subgroup of patients with KPC-Kp BSIs treated with ceftazidime/avibactam was matched by propensity score with a cohort of patients whose KPC-Kp BSIs had been treated with agents other than ceftazidime/avibactam with *in vitro* activity.

**Results:** One hundred and forty-seven patients were identified; 140 were infected with KPC producers and 7 with OXA-48 producers. For targeted therapy, 68 (46.3%) patients received monotherapy with ceftazidime/avibactam and 79 (53.7%) patients received ceftazidime/avibactam in combination with at least another active agent. The 14 and 28 day mortality rates were 9% and 20%, respectively. The 28 day mortality among the 71 patients with KPC-Kp BSIs treated with ceftazidime/avibactam was significantly lower than that observed in the 71 matched patients, whose KPC-Kp BSIs had been treated with agents other than ceftazidime/avibactam (18.3% versus 40.8%;  $P=0.005$ ). In the Cox proportional hazards model, ultimately fatal disease, rapidly fatal disease and Charlson comorbidity index  $\geq 2$  were independent predictors of death, whereas treatment with ceftazidime/avibactam-containing regimens was the only independent predictor of survival.

**Conclusions:** Ceftazidime/avibactam appears to be an effective treatment against serious infections caused by KPC-Kp.

## Introduction

Several official organizations, including the WHO<sup>1</sup> and the IDSA,<sup>2</sup> have designated antimicrobial resistance as one of the major problems affecting human health and health economics.<sup>3</sup> Carbapenem-resistant *Klebsiella pneumoniae* producing KPC-type carbapenemases (KPC-Kp) have emerged as important nosocomial pathogens, causing serious infections associated with high mortality.<sup>4–6</sup> Unfortunately, KPC-Kp exhibit extensive drug-resistant phenotypes and there has been an ongoing debate on the best strategies for the management of KPC-Kp infections.<sup>4</sup> The last-resort antibiotics, colistin and fosfomycin, as well as tigecycline, have been used in recent decades in critically ill hosts.<sup>7</sup> However, clinical utility is less than desirable owing to concerns over poor efficacy and their toxicity profiles, as well as matters of rapidly emerging resistance rates.<sup>7,8</sup>

A significant interest has arisen towards novel  $\beta$ -lactam/ $\beta$ -lactamase inhibitor combinations.<sup>9</sup> Ceftazidime/avibactam is a new combination antimicrobial agent consisting of a broad-spectrum cephalosporin, ceftazidime, and a novel non- $\beta$ -lactam  $\beta$ -lactamase inhibitor, avibactam, demonstrating *in vitro* activity against resistant Gram-negative bacteria, including MDR, XDR and even pan-drug-resistant Gram-negative bacteria producing ESBL, AmpC, KPC and some class D enzymes.<sup>9</sup> Ceftazidime/avibactam has been launched for the treatment of adults suffering from complicated intra-abdominal infection, complicated urinary tract infection and hospital-acquired pneumonia (HAP), including ventilator-associated pneumonia (VAP), in the USA<sup>10</sup> and Europe,<sup>11</sup> and has also been approved by the EMA for the treatment of patients with bacteraemia associated with complicated urinary tract infection, complicated intra-abdominal infection and HAP/VAP,<sup>12</sup> as well as for infections due to aerobic Gram-negative organisms with limited treatment options.<sup>11</sup> Recently, investigators have highlighted the beneficial effect of ceftazidime/avibactam in the treatment of KPC-Kp, signalling a turning point in the treatment of infections in terms of promising efficacy, favourable outcome and lower mortality.<sup>13–15</sup> However, the real-life experience of ceftazidime/avibactam in the treatment of KPC-Kp is still limited.<sup>13–15</sup>

The aim of the present study was to evaluate the therapeutic efficacy of ceftazidime/avibactam in patients with documented infections caused by *K. pneumoniae* producing KPC or OXA-48, just after the launch of ceftazidime/avibactam in Greece in December 2017. A secondary objective was to assess the efficacy of ceftazidime/avibactam in the subgroup of patients with KPC-Kp bacteraemia compared with a matched cohort of patients with bacteraemic KPC-Kp infections managed with the older antimicrobial agents.

## Methods

### Description of the study

This was a prospective, multicentre, registry study for ceftazidime/avibactam, organized by the Hellenic Society for Chemotherapy.

### Setting

The study was conducted between January 2018 and March 2019 in 14 tertiary care hospitals located throughout Greece [9 in Athens and 5 in other

districts (Thessaloniki, Patra, Larisa and Lamia)]. The study protocol was approved by the Ethics Committee of each participating hospital and written informed consent was obtained from all patients or their legal representatives.

### Patient population

Patients were eligible for inclusion in the study if they: (i) were  $\geq 18$  years old; (ii) had a microbiological documented infection caused by *K. pneumoniae* producing KPC or OXA-48 that exhibited susceptibility to ceftazidime/avibactam; and (iii) had received ceftazidime/avibactam alone or in combination with another antimicrobial agent for at least 72 h. Pertinent information, including demographic characteristics and host-, infection- and treatment-related factors were recorded in a predesigned form. Charlson's comorbidity index, APACHE II score, SOFA score and McCabe classification were evaluated as previously described.<sup>16–20</sup>

### Microbiology

Bacterial identification and routine susceptibility testing were performed in the clinical laboratories of each participating hospital in accordance with their standard protocols. Isolates were transferred to the Infectious Diseases Research Laboratory of Hygeia General Hospital for further study. Susceptibilities were retested using the VITEK<sup>®</sup> 2 system (bioMérieux, Marcy-l'Étoile, France). MICs of ceftazidime/avibactam were determined by Etest (bioMérieux), according to the manufacturer's instructions, as this agent was not included in the VITEK<sup>®</sup> 2 susceptibility card used. MICs of colistin were further determined by broth microdilution, as the performance of VITEK<sup>®</sup> 2 for colistin has been reported to be not satisfactory, with an unacceptable rate of very major errors (false-susceptible results) and essential agreement (MICs that differ by less than two dilutions).<sup>21</sup> *Escherichia coli* ATCC 25922, *K. pneumoniae* ATCC 700603 and *E. coli* NCTC 13846 (*mcr-1* positive) were used as quality control strains. The results were interpreted in accordance with the EUCAST clinical breakpoints.<sup>22</sup> Carbapenemase gene content was initially detected using the NG-Test CARBA 5 immunochromatographic assay (NG Biotech, Guipry, France) and confirmed by simplex in-house PCR assays targeting *bla*<sub>KPC</sub>, *bla*<sub>OXA-48-like</sub>, *bla*<sub>VIM</sub>, *bla*<sub>NDM</sub> and *bla*<sub>TIMP</sub>, with specific primers and conditions described previously.<sup>8</sup>

### Antibiotic therapy

Targeted antibiotic therapy was chosen by the attending physician of each patient based on the susceptibility profile of the infecting organism. Ceftazidime/avibactam was administered IV at a dosage of 2.5 g every 8 h in a 2 h infusion.<sup>10,11</sup> The remaining antimicrobial agents were administered as follows: colistin at a loading dose of 9 MIU followed by 4.5 MIU every 12 h in a 1 h infusion; tigecycline at a loading dose of 100–200 mg followed by 50–100 mg every 12 h in a 2 h infusion; fosfomycin at 6 g every 6 h in a 2 h infusion; meropenem at 2 g every 8 h in a 3 h infusion; and gentamicin at 5 mg/kg and amikacin at 15 mg/kg as a single daily dose in a 1 h infusion. Dosages were adjusted to creatinine clearance whenever indicated.<sup>7</sup>

### Definitions

The source of infection was determined using the CDC/National Healthcare Safety Network criteria.<sup>23</sup> Bloodstream infections (BSIs) were classified as primary, when no apparent source was identified, as secondary, when a source was identified, or as catheter related. Infection onset was reported as the date of the first specimen collection that yielded the infecting organism. Antimicrobial treatment administered before susceptibility testing was defined as empirical and treatment given after susceptibility testing had become available was defined as targeted. Treatment regimens were classified as monotherapy (treatment with one agent with *in vitro* activity) or combination therapy (treatment with two or more agents with *in vitro* activity). Clinical failure was defined as death or lack of clinical improvement

and microbiological failure as persistence of positive cultures with the index organism (in patients with repeated cultures available). Presumed eradication was defined as suspected microbiological eradication in accordance with clinical improvement without, however, microbiological confirmation due to non-feasibility of appropriate culture specimens.

### Statistical analysis

The main focus of interest was targeted antibiotic therapy with ceftazidime/avibactam. The primary outcome variable was the 28 day all-cause mortality, defined as the occurrence of death within 28 days from the date of specimen collection of the index culture. Secondary outcomes were: 14 day all-cause mortality and clinical and microbiological failure at day 14. Continuous variables are reported as mean  $\pm$  SD or median (IQR) and were assessed using Student's *t*-test (for normally distributed variables) or the Mann-Whitney *U*-test (for non-normally distributed variables), whereas categorical variables are expressed as frequency distributions of the group from which they were derived and were assessed using the  $\chi^2$  test. Survivors and non-survivors were assessed to identify factors associated with mortality. Cox proportional hazards regression was performed to identify factors independently associated with mortality. In order to examine the efficacy of ceftazidime/avibactam in the subgroup of patients with bacteraemia, a matched cohort of patients with KPC-Kp BSIs who had been managed in two of the participating hospitals and had received treatment regimens that did not include ceftazidime/avibactam was used as a control group. The two groups were matched with their propensity scores calculated by multivariate logistic analysis using age, Charlson's comorbidity index, McCabe classification, septic shock, ICU stay, source of BSI, colistin MIC and empirical therapy (active/not active) as the predictors. The 28 day all-cause mortality was compared between the matched groups with Cox proportional hazards regression, reporting in each case the *P* value and the HR with its related 95% CI. Data were processed and analysed using SPSS software (version 25) and corroborated with the R statistical package. The level of significance was set at 0.05.

## Results

### Patients

During the study period, a total of 149 patients were enrolled in the study. Two patients were excluded from the analysis due to bacteria not producing KPC or OXA-48 and the final population consisted of 147 patients. One hundred and nine patients (74.1%) were male and 38 (25.9%) were female; the mean  $\pm$  SD age of the patients was 60.9 $\pm$ 17.10 years. One hundred and twenty-eight (87.1%) infection episodes were hospital acquired and 19 (12.9%) were healthcare associated; an equal number of infections occurred in the wards (73, 49.7%) and in ICUs (74, 50.3%). Bacteraemia was confirmed in 95 (64.6%) patients [31 (21.1%) primary, 44 (29.9%) secondary and 20 (13.6%) catheter related]. Secondary BSI site-specific sources were urinary tract infection (16, 36.4%), VAP/HAP (12, 27.3%), intra-abdominal infection (11, 25%) and skin and skin structure infection (5, 11.3%). VAP and HAP were the most common infections (*n*=37) followed by complicated urinary tract infection (*n*=33) and intra-abdominal infection (*n*=15). The median Charlson comorbidity index was 2; 45 (30.6%) patients had ultimately fatal, 21 (14.3%) patients had rapidly fatal and 81 (55.1%) patients had non-fatal underlying disease. The APACHE II and SOFA scores at the onset of infection were 16.5 $\pm$ 7.6 and 6.7 $\pm$ 4.2, respectively. Fifty patients (34%) manifested septic shock and 97 (66%) sepsis (by Sepsis-3)<sup>24</sup> (Table 1).

### Microorganisms

The majority of the isolates (140, 95%) produced KPC, whereas the remaining 7 (5%) produced OXA-48, with a median ceftazidime/avibactam MIC of 1 mg/L (range = 0.25–6 mg/L). As expected, all strains were resistant to penicillin/inhibitor combinations and expanded-spectrum cephalosporins and the vast majority exhibited resistance to meropenem (99%). Rates of resistance to colistin, fosfomycin, tigecycline and aminoglycosides were 34%, 34%, 44% and 69%, respectively.

### Treatment

For empirical antimicrobial treatment, 59 patients (40.1%) received no active agent and 88 (59.9%) received at least one active agent. Of note, in 20 patients the active empirical regimen included ceftazidime/avibactam. For targeted therapy, 68 (46.3%) patients received monotherapy with ceftazidime/avibactam and 79 (53.7%) received ceftazidime/avibactam in combination with at least another active agent [colistin (*n*=28), aminoglycosides (*n*=20), colistin plus tigecycline (*n*=15), tigecycline (*n*=9), trimethoprim/sulfamethoxazole (*n*=3), fosfomycin (*n*=1), ciprofloxacin (*n*=1), colistin plus aminoglycoside (*n*=1) and tigecycline plus fosfomycin (*n*=1)]. The median duration of ceftazidime/avibactam treatment was 13 days (range = 5–50 days). Infection source control was performed when indicated in 32 patients [removal of central IV catheter in 20 patients with catheter-related BSIs, nephrostomy or pigtail insertion in 7 patients with urinary tract obstruction, percutaneous or surgical drainage in 3 patients with intra-abdominal or skin and soft tissue infections, and placement of a chest tube in 2 patients with empyema].

### Outcome

The all-cause 14 and 28 day mortality was 9% and 20%, respectively. The highest mortality rate (37.8%) was observed in patients with VAP or HAP and the lowest in those with complicated intra-abdominal infection (13.3%) and complicated urinary tract infection (15.2%). At day 14, clinical success was observed in 81.0% (119/147) of patients, clinical failure in 10.2% (15/147) and in 8.8% (13/147) the clinical outcome was undetermined. In terms of microbiological response, at day 14, in 50.4% (74/147) of patients the pathogen was eradicated, in 37.4% (55/147) of patients the pathogen was presumably eradicated and in the remaining 12.2% (18/147) of patients the pathogen persisted. Emergence of resistance to ceftazidime/avibactam during therapy was observed in two patients (1.4%) [one patient with BSI treated with combination therapy and one with complicated urinary tract infection treated with ceftazidime/avibactam monotherapy]. Relapse of infection after discontinuation of ceftazidime/avibactam therapy during hospitalization was observed in six (4.1%) patients [two patients relapsed with KPC-Kp susceptible to ceftazidime/avibactam and four with *K. pneumoniae* producing both KPC and MBL exhibiting resistance to ceftazidime/avibactam].

The effects of host-, infection- and treatment-related factors on 28 day mortality are shown in Table 1. By entering the variables with a potential effect on mortality in the Cox proportional hazards model, rapidly fatal diseases [HR of death compared with non-fatal disease = 4.83 (95% CI = 2.05–11.39); *P* = 0.001], Charlson's comorbidity index  $\geq$  2 [HR = 1.16 (95% CI = 1.02–1.33); *P* = 0.024]

**Table 1.** Univariate analysis of factors associated with all-cause 28 day mortality in 147 patients infected with *K. pneumoniae* producing KPC or OXA-48

| Characteristic                                   | All patients (N = 147) | Survivors (N = 117) | Non-survivors (N = 30) | P     |
|--------------------------------------------------|------------------------|---------------------|------------------------|-------|
| Age (years), mean (SD)                           | 60.9 (17.1)            | 59.7 (17.2)         | 65.5 (16.0)            | 0.109 |
| Gender, n (%)                                    |                        |                     |                        |       |
| male                                             | 109 (74.1)             | 85 (72.6)           | 24 (80.0)              | 0.490 |
| female                                           | 38 (25.9)              | 32 (27.4)           | 6 (20.0)               |       |
| Acquisition of infection, n (%)                  |                        |                     |                        |       |
| hospital acquired                                | 128 (87.1)             | 102 (87.2)          | 26 (86.7)              | 1.00  |
| healthcare associated                            | 19 (12.9)              | 15 (12.8)           | 4 (13.3)               |       |
| Ward at onset of infection, n (%)                |                        |                     |                        |       |
| ICU                                              | 74 (50.3)              | 59 (50.4)           | 15 (50.0)              | 1.00  |
| non-ICU                                          | 73 (49.7)              | 58 (49.6)           | 15 (50.0)              |       |
| Charlson comorbidity index, median (IQR)         | 2 (1–5)                | 2 (0–4)             | 3.5 (1–7)              | 0.032 |
| Severity of underlying disease, n (%)            |                        |                     |                        |       |
| non-fatal                                        | 81 (55.1)              | 71 (60.7)           | 10 (33.3)              | 0.001 |
| ultimately fatal                                 | 45 (30.6)              | 37 (31.6)           | 8 (26.7)               |       |
| rapidly fatal                                    | 21 (14.3)              | 9 (7.7)             | 12 (40.0)              |       |
| APACHE II score at onset of infection, mean (SD) | 16.5 (7.6)             | 15.4 (7.0)          | 21.0 (8.4)             | 0.001 |
| SOFA score at onset of infection, mean (SD)      | 6.7 (4.2)              | 6.2 (4.0)           | 8.3 (4.5)              | 0.031 |
| Carbapenemase type, n (%)                        |                        |                     |                        |       |
| KPC                                              | 140 (95)               | 113 (96.6)          | 27 (90)                | 0.150 |
| OXA-48                                           | 7 (5)                  | 4 (3.4)             | 3 (10)                 |       |
| Severity of infection, n (%)                     |                        |                     |                        |       |
| sepsis                                           | 97 (66.0)              | 80 (68.4)           | 17 (56.7)              | 0.281 |
| septic shock                                     | 50 (34.0)              | 37 (31.6)           | 13 (43.3)              |       |
| Source of infection, n (%)                       |                        |                     |                        |       |
| BSI                                              | 95 (64.6)              | 78 (66.7)           | 17 (56.7)              | 0.989 |
| primary                                          | 31 (21.1)              | 25 (21.4)           | 6 (20.0)               |       |
| secondary <sup>a</sup>                           | 44 (29.9)              | 34 (29.1)           | 10 (33.3)              |       |
| catheter related                                 | 20 (13.6)              | 19 (16.2)           | 1 (3.3)                |       |
| urinary tract infection                          | 33 (22.4)              | 28 (23.9)           | 5 (16.7)               |       |
| HAP/VAP                                          | 37 (25.2)              | 23 (19.7)           | 14 (46.7)              |       |
| intra-abdominal infection                        | 15 (10.2)              | 13 (11.1)           | 2 (6.7)                |       |
| other                                            | 11 (7.5)               | 9 (7.7)             | 2 (6.7)                |       |
| Empirical treatment, n (%)                       |                        |                     |                        |       |
| no active drug                                   | 59 (40.1)              | 46 (39.3)           | 13 (43.3)              | 0.912 |
| at least one active drug                         | 88 (59.9)              | 71 (60.7)           | 17 (56.7)              |       |
| Targeted therapy, n (%)                          |                        |                     |                        |       |
| ceftazidime/avibactam monotherapy                | 68 (46.3)              | 60 (51.3)           | 8 (26.7)               | 0.023 |
| ceftazidime/avibactam combination therapy        | 79 (53.7)              | 57 (48.7)           | 22 (73.3)              |       |

<sup>a</sup>Secondary BSI site-specific sources were urinary tract infection (16, 36.4%), VAP/HAP (12, 27.3%), intra-abdominal infection (11, 25%) and skin and skin structure infection (5, 11.3%).

and combination therapy with ceftazidime/avibactam [HR of death for combination therapy versus monotherapy = 2.49 (95% CI = 1.1–5.63); *P* = 0.029] were identified as independent predictors of death.

Table 2 shows the clinical characteristics of 71 patients with KPC-Kp BSIs who received treatment with a regimen containing ceftazidime/avibactam (cases) and of 71 patients, matched by propensity score, whose KPC-Kp BSIs were treated with regimens not containing ceftazidime/avibactam (controls). The results of univariate analysis of factors associated with 28 day mortality are shown in Table 3. The all-cause 28 day mortality rate of patients

treated with ceftazidime/avibactam-based regimens was significantly lower than that of controls (18.3% versus 40.8%; *P* = 0.005). The mortality rates within the various treatment groups among the 142 patients with KPC-Kp BSIs (cases and controls) are shown in Figure 1; the lowest mortality was observed in patients treated with aminoglycoside monotherapy (1/6, 16.7%) or ceftazidime/avibactam-containing regimens (13/71, 18.3%) and the highest in patients treated with colistin monotherapy (4/9, 44%) or tigecycline monotherapy (7/14, 50%).

By entering the variables with a potential effect on mortality in the Cox proportional hazards model, ultimately fatal disease

**Table 2.** Characteristics of 142 patients with KPC-Kp bacteraemia according to treatment regimen after propensity-score matching

| Variable                                 | Therapy                           |                                                      | P     |
|------------------------------------------|-----------------------------------|------------------------------------------------------|-------|
|                                          | other regimens (controls), N = 71 | ceftazidime/avibactam-based regimens (cases), N = 71 |       |
| Gender, n (%)                            |                                   |                                                      |       |
| male                                     | 47 (66.2)                         | 48 (67.6)                                            | 1.000 |
| female                                   | 24 (33.8)                         | 23 (32.4)                                            |       |
| Age (years), mean (SD)                   | 64.0 (16.9)                       | 61.4 (17.2)                                          | 0.356 |
| Charlson comorbidity index, median (IQR) | 2 (1–4)                           | 2 (1–4)                                              | 0.471 |
| Severity of underlying disease, n (%)    |                                   |                                                      |       |
| non-fatal                                | 41 (57.7)                         | 43 (60.6)                                            | 0.874 |
| ultimately fatal                         | 20 (28.2)                         | 20 (28.2)                                            |       |
| rapidly fatal                            | 10 (14.1)                         | 8 (11.3)                                             |       |
| Acquisition of infection, n (%)          |                                   |                                                      |       |
| healthcare associated                    | 10 (14.1)                         | 11 (15.5)                                            | 1.000 |
| hospital acquired                        | 61 (85.9)                         | 60 (84.5)                                            |       |
| Ward at onset of infection, n (%)        |                                   |                                                      |       |
| non-ICU                                  | 39 (54.9)                         | 36 (50.7)                                            | 0.737 |
| ICU                                      | 32 (45.1)                         | 35 (49.3)                                            |       |
| Source of BSI, n (%)                     |                                   |                                                      |       |
| urinary tract infection                  | 9 (12.7)                          | 14 (19.7)                                            | 0.363 |
| non-urinary tract infection              | 62 (87.3)                         | 57 (80.3)                                            |       |
| Severity of sepsis, n (%)                |                                   |                                                      |       |
| sepsis                                   | 42 (59.2)                         | 46 (64.8)                                            | 0.604 |
| septic shock                             | 29 (40.8)                         | 25 (35.2)                                            |       |
| Empirical treatment, n (%)               |                                   |                                                      |       |
| no active drug                           | 32 (45.1)                         | 26 (36.6)                                            | 0.393 |
| at least one active drug                 | 39 (54.9)                         | 45 (63.4)                                            |       |
| Colistin MIC, median (IQR)               | 0.38 (0.25–8)                     | 1.0 (0.5–16)                                         | 0.001 |
| Propensity index, mean (SD)              | 0.45 (0.15)                       | 0.48 (0.16)                                          | 0.350 |

[HR = 2.25 (95% CI = 1.08–4.70);  $P = 0.03$ ], rapidly fatal disease [HR = 6.4 (95% CI = 2.0–20.5);  $P = 0.001$ ] and Charlson comorbidity index  $\geq 2$  [HR = 2.44 (95% CI = 1.08–5.52);  $P = 0.032$ ] were identified as independent predictors of death, whereas treatment with ceftazidime/avibactam-containing regimens [HR = 0.37 (95% CI = 0.19–0.71);  $P = 0.003$ ] remained an independent predictor of survival (Table 4 and Figure 2).

## Discussion

The findings presented herein provide useful information on the efficacy of ceftazidime/avibactam in the treatment of serious infections caused by *K. pneumoniae* producing KPC or OXA-48. In particular, ceftazidime/avibactam was effective in the treatment of a broad range of serious infections caused by *K. pneumoniae* producing KPC or OXA-48. More importantly, treatment with ceftazidime/avibactam provided survival benefit compared with other antimicrobial agents against KPC-Kp (mostly colistin) and its administration was an independent predictor for favourable outcome in KPC-Kp bacteraemic patients.

A growing body of literature has investigated the treatment outcomes in patients infected with carbapenem-resistant

*K. pneumoniae*.<sup>4,25–28</sup> When applying commonly used antibiotics for *K. pneumoniae*, combination treatment with at least two antibiotics with *in vitro* activity has been reported to be beneficial in terms of survival.<sup>25,26</sup> Particularly, the combination of meropenem (if MIC is  $\leq 8$  mg/L) with gentamicin or colistin or tigecycline has been associated with a reduction in mortality.<sup>25–28</sup> However, in the absence of a carbapenem in combination treatment, mortality rates ranged around 35%<sup>25</sup> and increased up to 48% in patients with an INCREMENT mortality score  $\geq 8$ .<sup>27</sup> In our study, meropenem resistance rates rose to 99%, indicating the necessity of a novel treatment for KPC infections. On the other hand, ceftazidime/avibactam, although approved for complicated urinary tract infection and complicated intra-abdominal infection,<sup>10,11</sup> has been mostly utilized in ‘difficult-to-treat infections’ caused by KPC-Kp.<sup>11,13–15,29–31</sup> In the majority of published studies, mortality rates of patients with KPC infections treated with ceftazidime/avibactam are reported to be below 20%;<sup>13,14,30,31</sup> however, in a few studies the rates exceed 30%.<sup>15,29</sup> Shields *et al.*<sup>13</sup> reported mortality of 15%, whereas van Duin *et al.*<sup>14</sup> reported an even lower mortality rate of 8% (compared with 38% for colistin). In our cohort, the all-cause 28 day mortality rate was rather low (calculated at around 20%). These results are quite impressive taking into

**Table 3.** Univariate analysis of factors associated with all-cause 28 day mortality in 142 patients with KPC-Kp (cases and controls)

| Characteristic                           | All patients (N=142) | Survivors (N=100) | Non-survivors (N=42) | P      |
|------------------------------------------|----------------------|-------------------|----------------------|--------|
| Age (years), mean (SD)                   | 62.7 (17.0)          | 62.2 (17.8)       | 63.9 (15.3)          | 0.600  |
| Gender, n (%)                            |                      |                   |                      |        |
| male                                     | 95 (66.9)            | 70 (70.0)         | 25 (59.5)            | 0.245  |
| female                                   | 47 (33.1)            | 30 (30.0)         | 17 (40.5)            |        |
| Acquisition of infection, n (%)          |                      |                   |                      |        |
| hospital acquired                        | 121 (85.2)           | 86 (86.0)         | 35 (83.3)            | 0.796  |
| healthcare associated                    | 21 (14.8)            | 14 (14.0)         | 7 (16.7)             |        |
| Ward at onset of infection, n (%)        |                      |                   |                      |        |
| ICU                                      | 67 (47.2)            | 48 (48.0)         | 19 (45.2)            | 0.854  |
| non-ICU                                  | 75 (52.8)            | 52 (52.0)         | 23 (54.8)            |        |
| Charlson comorbidity index, median (IQR) | 2 (1-4)              | 2 (0-3)           | 3 (2-5)              | 0.007  |
| Severity of underlying disease, n (%)    |                      |                   |                      |        |
| non-fatal                                | 84 (59.2)            | 70 (70.0)         | 14 (33.3)            | <0.001 |
| ultimately fatal                         | 40 (28.2)            | 22 (22.0)         | 18 (42.9)            |        |
| rapidly fatal                            | 18 (12.7)            | 8 (8.0)           | 10 (23.8)            |        |
| Severity of infection, n (%)             |                      |                   |                      |        |
| sepsis                                   | 88 (62.0)            | 67 (67.0)         | 21 (50.0)            | 0.062  |
| septic shock                             | 54 (38.0)            | 33 (33.0)         | 21 (50.0)            |        |
| Source of infection, n (%)               |                      |                   |                      |        |
| urinary tract infection                  | 119 (83.8)           | 83 (83.0)         | 36 (85.7)            | 0.806  |
| non-urinary tract infection              | 23 (16.2)            | 17 (17.0)         | 6 (14.3)             |        |
| Empirical treatment, n (%)               |                      |                   |                      |        |
| no active drug                           | 58 (40.8)            | 40 (40.0)         | 18 (42.9)            | 0.852  |
| at least one active drug                 | 84 (59.2)            | 60 (60.0)         | 24 (57.1)            |        |
| Targeted therapy, n (%)                  |                      |                   |                      |        |
| ceftazidime/avibactam-based regimen      | 71 (50.0)            | 58 (58.0)         | 13 (31.0)            | 0.005  |
| other antimicrobial regimen              | 71 (50.0)            | 42 (42.0)         | 29 (69.0)            |        |

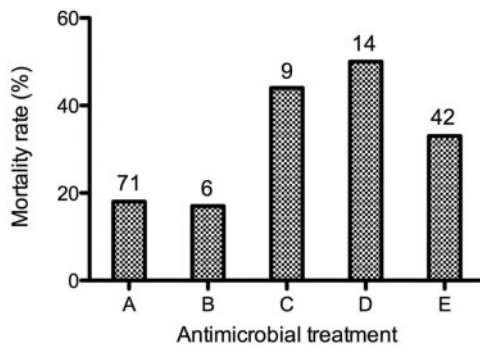

**Figure 1.** All-cause 28 day mortality in 142 patients with KPC-producing *K. pneumoniae* bloodstream infections according to treatment regimen: A, ceftazidime/avibactam alone or in combination with another agent with *in vitro* activity; B, aminoglycoside monotherapy; C, colistin monotherapy; D, tigecycline monotherapy; E, combination of two or more active antimicrobial agents (not including ceftazidime/avibactam). The bars indicate the mortality rates and the number above each bar indicates the number of patients treated with that regimen.

consideration the critical illness of the patients, 50% being hospitalized in the ICU, with septic shock in 34% and high SOFA and APACHE II scores.

**Table 4.** Cox proportional hazards model of factors associated with all-cause 28 day mortality in 142 patients with KPC-Kp bloodstream infections

| Variable                                                 | HR (95% CI)      | P     |
|----------------------------------------------------------|------------------|-------|
| Severity of underlying disease                           |                  |       |
| ultimately fatal/non-fatal                               | 2.25 (1.08-4.70) | 0.03  |
| rapidly fatal/non-fatal                                  | 6.4 (2.0-20.5)   | 0.001 |
| Charlson comorbidity index $\geq 2$                      | 2.44 (1.08-5.52) | 0.032 |
| Septic shock/sepsis                                      | 1.67 (0.90-3.12) | 0.100 |
| Ceftazidime/avibactam-based therapy/other antimicrobials | 0.37 (0.19-0.71) | 0.003 |

Empirical therapy for the treatment of KPC-Kp BSI is an essential matter. Adequate and timely administration of empirical therapy has been linked with improved survival. In an observational study with 102 patients with KPC-Kp BSI, the median time to an appropriate antibiotic was shorter in patients who survived, and receipt of therapy with *in vitro* activity within 24 h was associated with reduced 30 day mortality.<sup>32</sup> Moreover, receipt of ceftazidime/avibactam within 48 h of infection onset was associated with reduced

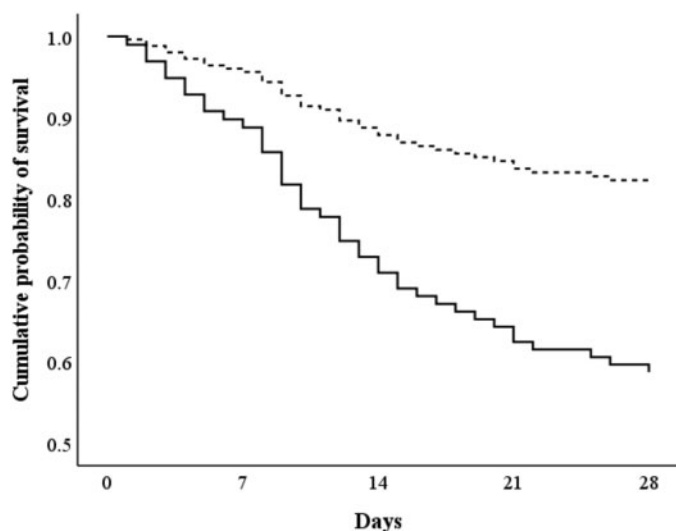

**Figure 2.** Cumulative probability of survival of 142 patients with KPC-producing *K. pneumoniae* bloodstream infections according to treatment regimen adjusted for severity of underlying diseases (McCabe classification), Charlson's comorbidity index and septic shock. Broken line, regimens containing ceftazidime/avibactam; continuous line, other treatment regimens (not containing ceftazidime/avibactam). HR=0.37 (95% CI=0.19–0.71);  $P=0.003$  (Cox proportional hazards regression model).

clinical failure [OR=0.409 (95% CI=0.180–0.930)].<sup>31</sup> Notably, ceftazidime/avibactam regimens were also associated with reduced risk of a composite endpoint (30 day mortality or nephrotoxicity).<sup>32</sup> In our study, empirical therapy with at least one drug with *in vitro* activity amongst survivors was correlated with higher percentages of survival (71/117, 60.7%), when compared with patients treated empirically with no active regimen (46/117, 39.3%) (Table 1).

In the present study, ceftazidime/avibactam treatment in the subgroup of patients with KPC-Kp bacteraemia resulted in a significantly lower mortality rate (18%) compared with that achieved by other antimicrobial agents, which rose to 41%. Also, it is important to note, that in our cohort, treatment with ceftazidime/avibactam-containing regimens was the only independent predictor of survival. Our findings are in line with those of an Italian study that showed 30 day mortality among 104 patients with bacteraemic KPC-Kp infections treated with ceftazidime/avibactam to be lower than that of a matched cohort whose KPC-Kp bacteraemia was treated with drugs other than ceftazidime/avibactam.<sup>15</sup> Similarly, in another cohort study, ceftazidime/avibactam was superior to other antimicrobial agents in the treatment of carbapenem-resistant Enterobacteriaceae (CRE) infections in terms of survival, clinical outcome and microbiological eradication.<sup>30</sup>

In the pre-ceftazidime/avibactam era, combination treatment with two or more agents with *in vitro* activity was considered to be superior to monotherapy in the treatment of CRE infections, particularly in patients with septic shock, high mortality score or rapidly fatal underlying diseases.<sup>25–28</sup> In the present study, however, combination therapy with ceftazidime/avibactam did not provide any survival benefit as compared with ceftazidime/avibactam monotherapy. Instead, the patients treated with ceftazidime/avibactam alone had better outcomes compared with

those treated with ceftazidime/avibactam in combination with another active agent. The observed difference, in favour of the monotherapy group, could be explained by the inclusion of more serious infections in the combination group as physicians have the temptation to treat critically ill patients with more than one antibiotic. Indeed, in the present study, combination therapy was prescribed more often in more severe and septic shock patients (monotherapy versus combination treatment, 36% versus 64%;  $P=0.165$ ). It is worth mentioning, however, that this difference was lost in the propensity-matched patients with BSIs. It is important to notice that ceftazidime/avibactam monotherapy has been applied in other studies and has also shown remarkable clinical success rates.<sup>13,15,31,33</sup> Furthermore, in a meta-analysis, including 11 studies with 396 subjects (202 in the ceftazidime/avibactam combination group and 194 in the ceftazidime/avibactam monotherapy group), ceftazidime/avibactam monotherapy and ceftazidime/avibactam combination therapy against CRE infections resulted in similar outcomes with regard to microbiological eradication and mortality rates.<sup>34</sup> Likewise, in a more recent network meta-analysis, consisting of 13 studies with 503 patients, no difference was observed in terms of mortality regarding ceftazidime/avibactam monotherapy and combination treatment [OR=0.96 (95% CI=0.65–1.41)].<sup>35</sup> The consistent lack of benefit of combination therapy across studies<sup>13,15,31,33</sup> and the potential toxicity of combination therapy<sup>13,31</sup> raises a major question about any additional benefit provided by ceftazidime/avibactam combination as compared with monotherapy and merits further investigation. However, more evidence is required in order to make robust conclusions regarding ceftazidime/avibactam monotherapy or combination therapy for the treatment of KPC-Kp infections.

It is of great significance to mention that treatment of different types of infection among patients with CRE pathogens differs dramatically.<sup>15</sup> The lowest mortality rates were observed in complicated intra-abdominal infection and complicated urinary tract infection, in accordance with other studies dealing with KPC-Kp infections.<sup>15,26</sup> On the other hand, it has been clearly illustrated that pneumonia is a risk factor for ceftazidime/avibactam treatment failure.<sup>36</sup> In our study, the highest mortality rate was noticed in the subgroup of patients with pneumonia (reaching 38%). Furthermore, in a retrospective study, clinical success rates in patients with pneumonia were the lowest (36%) in comparison with patients with bacteraemia (75%).<sup>36</sup> The adverse outcome among patients with CRE pneumonia cannot be clearly attributed to pharmacokinetic parameters, as ceftazidime/avibactam achieves adequate concentrations in the epithelial lining fluid.<sup>37</sup> However, ceftazidime/avibactam pharmacokinetics in critically ill patients have not yet been studied. On the other hand, in a Phase 3 randomized trial (REPROVE study), ceftazidime/avibactam was found to be non-inferior to meropenem in patients with nosocomial pneumonia caused by Gram-negative organisms.<sup>38</sup> Despite the non-inferiority of ceftazidime/avibactam to meropenem for nosocomial pneumonia, it should be underlined that only six patients were infected with CRE in the aforementioned study, limiting our ability to draw conclusions on the efficacy of ceftazidime/avibactam in nosocomial pneumonia caused by KPC-producing pathogens.<sup>38</sup> Therefore, further studies focusing on VAP/HAP caused by MDR and XDR CRE treated with ceftazidime/avibactam are required.

Although ceftazidime/avibactam is mostly prescribed for KPC-Kp infections,<sup>13–15</sup> ceftazidime/avibactam has been reported as having *in vitro* activity against 92.5% of OXA-48-producing isolates;<sup>39</sup> however, clinical experience is limited and the data are conflicting.<sup>29,40,41</sup> In our series, only seven infections were caused by OXA-48 producers and the observed mortality rate was 43%. However, the small sample hindered the ability to make firm conclusions. Sousa et al.<sup>40</sup> reported 54 patients treated with ceftazidime/avibactam as salvage treatment for infections caused by OXA-48-producing *K. pneumoniae* with a 30 day mortality rate of 22%. Likewise, in a smaller retrospective study with 24 infections caused by OXA-48 producers, the 30 day mortality was 8.3%.<sup>41</sup> On the other hand, Temkin et al.<sup>29</sup> in a retrospective study, noticed a higher mortality in patients with OXA-48-producing Enterobacterales (8/13, 61.5%) compared with patients with infections caused by KPC producers (6/23, 26.1%). Therefore, more data are required to elucidate the role of ceftazidime/avibactam in the treatment of infections caused by OXA-48-producing *K. pneumoniae*.

Development of resistance is a major issue of concern during treatment with ceftazidime/avibactam. Soon after ceftazidime/avibactam entered the market, both *in vitro* and *in vivo* emergence of resistance to ceftazidime/avibactam was observed.<sup>13,15,42–44</sup> In our cohort, resistance during therapy was observed in two patients (1.4%) and relapse with a ceftazidime/avibactam-resistant strain (producing both KPC and MBL) occurred in 2.7%. Similar rates of resistance to ceftazidime/avibactam have been reported in other studies,<sup>15,31</sup> with the exception of the study by Shields et al.,<sup>13</sup> reporting a higher resistance rate (8.1%) during treatment. Nevertheless, the emergence of resistance to ceftazidime/avibactam is independent from previous antimicrobial exposure and, therefore, is more worrisome and prompts early awareness.<sup>45,46</sup>

Our findings should not be interpreted without considering several limitations. We acknowledge the observational character of the study and the inherent shortcomings that exist in this type of study. Thus, unrecognized variables with potential effects on outcome might have influenced the results. However, a propensity-matched group of patients with KPC bacteraemic infections was used and multivariate Cox regression analysis was performed to control for such confounders and potential bias.

Notwithstanding these limitations, the data presented herein highlight ceftazidime/avibactam as an independent predictor in terms of survival, in particular in bacteraemic patients, for the treatment of infections caused by carbapenemase-producing *K. pneumoniae* and provide practical and useful information that may assist clinicians to adopt more effective strategies for the treatment of KPC infections.

## Acknowledgements

Part of the work was presented in the European Congress of Clinical Microbiology and Infectious Diseases Abstract Book 2020 (Abstract 5234).

We thank Rania Karantani for technical work and Miltiades Kyprianou for outstanding statistical analysis.

## Other members of the Hellenic Ceftazidime/Avibactam Registry Study Group

V. Papoutsaki and H. Papadogeorgaki (Hygeia General Hospital, Athens, Greece); C. Tsapas (Peripheral General Hospital of Peiraias Tzaneio,

Athens, Greece); M. Astriti, V. Romanou and E. Makronassios (Peripheral General Hospital Giorgos Gennimatas, Athens, Greece); P. Giona (Mediterraneo Hospital, Athens, Greece); K. Pontikis (Sotiria General Hospital of Chest Diseases of Athens, Athens, Greece); N. Gatselis (University of Thessaly, Larissa, Greece); E. Massa and E. Michailidou (Ippokrateio General Hospital of Thessaloniki, Thessaloniki, Greece); C. Gogos (University of Patras, Department of Medicine, Medical School, Patras, Greece).

## Funding

This study was supported by the Hellenic Society for Chemotherapy.

## Transparency declarations

I.K. has received speaker's honoraria from Pfizer and bioMérieux, G.L.D. has received grants and honoraria from Pfizer and honoraria from Menarini and MSD outside of the submitted work, A.G. has received speaker's honoraria from Pfizer, S.S. has received speaker's honoraria from Pfizer, K.A. has received speaker's honoraria from Pfizer, G.P. has received speaker's honoraria from Pfizer, Angelini, Bio-Rad, MSD and Pfizer, and H.G. has received speaker's honoraria from Pfizer and MSD. All other authors: none to declare.

## References

- 1 WHO. Antimicrobial Resistance: No Action Today, No Cure Tomorrow. 2011. <https://www.who.int/world-health-day/2011/en>.
- 2 Boucher HW, Talbot GH, Bradley JS et al. Bad bugs, no drugs: no ESKAPE! An update from the Infectious Diseases Society of America. *Clin Infect Dis* 2009; **48**: 1–12.
- 3 Tängdén T, Giske CG. Global dissemination of extensively drug-resistant carbapenemase-producing Enterobacteriaceae: clinical perspectives on detection, treatment and infection control. *J Intern Med* 2015; **277**: 501–12.
- 4 Tzouveleki LS, Markogiannakis A, Piperaki E et al. Treating infections caused by carbapenemase-producing Enterobacteriaceae. *Clin Microbiol Infect* 2014; **20**: 862–72.
- 5 Munoz-Price LS, Poirel L, Bonomo RA et al. Clinical epidemiology of the global expansion of *Klebsiella pneumoniae* carbapenemases. *Lancet Infect Dis* 2013; **13**: 785–96.
- 6 Albiger B, Glasner C, Struelens MJ et al. Carbapenemase-producing Enterobacteriaceae in Europe: assessment by national experts from 38 countries, May 2015. *Euro Surveill* 2015; **20**: pii=30062.
- 7 Karaiskos I, Lagou S, Pontikis K et al. The “old” and the “new” antibiotics for MDR Gram-negative pathogens: for whom, when, and how. *Front Public Health* 2019; **7**: 151.
- 8 Galani I, Karaiskos I, Karantani I et al. Epidemiology and resistance phenotypes of carbapenemase-producing *Klebsiella pneumoniae* in Greece, 2014 to 2016. *Euro Surveill* 2018; **23**: pii=1700775.
- 9 Karaiskos I, Galani I, Souli M et al. Novel  $\beta$ -lactam- $\beta$ -lactamase inhibitor combinations: expectations for the treatment of carbapenem-resistant Gram-negative pathogens. *Expert Opin Drug Metab Toxicol* 2019; **15**: 133–49.
- 10 FDA. AVYCAZ (Ceftazidime and Avibactam) For Injection, For Intravenous Use. 2016. [www.accessdata.fda.gov/drugsatfda\\_docs/label/2016/206494s002lbl.pdf](http://www.accessdata.fda.gov/drugsatfda_docs/label/2016/206494s002lbl.pdf).
- 11 EMA. Zavicefta: Summary of Product Characteristics. 2018. [http://www.ema.europa.eu/docs/en\\_GB/document\\_library/EPAR\\_Product\\_Information/human/004027/WC500210234.pdf](http://www.ema.europa.eu/docs/en_GB/document_library/EPAR_Product_Information/human/004027/WC500210234.pdf).
- 12 EMA. Zavicefta: Ceftazidime/Avibactam. 2020. <https://www.ema.europa.eu/en/medicines/human/summaries-opinion/zavicefta>.



- 13** Shields RK, Nguyen MH, Chen L *et al*. Ceftazidime-avibactam is superior to other treatment regimens against carbapenem-resistant *Klebsiella pneumoniae* bacteremia. *Antimicrob Agents Chemother* 2017; **61**: e00883-17.
- 14** van Duin D, Lok JJ, Earley M *et al*. Colistin versus ceftazidime-avibactam in the treatment of infections due to carbapenem-resistant Enterobacteriaceae. *Clin Infect Dis* 2018; **66**: 163–71.
- 15** Tumbarello M, Trecarichi EM, Corona A *et al*. Efficacy of ceftazidime-avibactam salvage therapy in patients with infections caused by KPC-producing *Klebsiella pneumoniae*. *Clin Infect Dis* 2019; **68**: 355–64.
- 16** Knaus WA, Draper EA, Wagner DP *et al*. APACHE II: a severity of disease classification system. *Crit Care Med* 1985; **13**: 818–29.
- 17** Vincent JL, Moreno R, Takala J *et al*. The SOFA (Sepsis-related Organ Failure Assessment) score to describe organ dysfunction/failure. On behalf of the Working Group on Sepsis-Related Problems of the European Society of Intensive Care Medicine. *Intensive Care Med* 1996; **22**: 707–10.
- 18** Charlson ME, Pompei P, Ales KL *et al*. A new method of classifying prognostic comorbidity in longitudinal studies: development and validation. *J Chronic Dis* 1987; **40**: 373–83.
- 19** McCabe MR, Jackson GG. Gram-negative bacteremia. II. Clinical, laboratory and therapeutic observations. *Arch Intern Med* 1962; **110**: 856–64.
- 20** ECDC. Technical Document. Point Prevalence Survey of Healthcare-Associated Infections and Antimicrobial Use in European Acute Care Hospitals. 2012. <https://www.ecdc.europa.eu/sites/default/files/media/en/publications/Publications/0512-TED-PPS-HAI-antimicrobial-use-protocol.pdf>.
- 21** Lellouche J, Schwartz D, Elmalech N *et al*. Combining VITEK® 2 with colistin agar dilution screening assist timely reporting of colistin susceptibility. *Clin Microbiol Infect* 2019; **25**: 711–6.
- 22** EUCAST. Breakpoint Tables for Interpretation of MICs and Zone Diameters, Version 9.0. [http://www.eucast.org/fileadmin/src/media/PDFs/EUCAST\\_files/Breakpoint\\_tables/v\\_9.0\\_Breakpoint\\_Tables.pdf](http://www.eucast.org/fileadmin/src/media/PDFs/EUCAST_files/Breakpoint_tables/v_9.0_Breakpoint_Tables.pdf).
- 23** Horan TC, Andrus M, Dudeck MA. CDC/NHSN surveillance definition of health care-associated infection and criteria for specific types of infections in the acute care setting. *Am J Infect Control* 2008; **36**: 309–32.
- 24** Singer M, Deutschman CS, Seymour CW *et al*. The Third International Consensus Definitions for Sepsis and Septic Shock (Sepsis-3). *JAMA* 2016; **315**: 801–10.
- 25** Daikos GL, Tsaousi S, Tzouveleki LS *et al*. Carbapenemase-producing *Klebsiella pneumoniae* bloodstream infections: lowering mortality by antibiotic combination schemes and the role of carbapenems. *Antimicrob Agents Chemother* 2014; **58**: 2322–8.
- 26** Tumbarello M, Trecarichi EM, De Rosa FG *et al*. Infections caused by KPC-producing *Klebsiella pneumoniae*: differences in therapy and mortality in a multicentre study. *J Antimicrob Chemother* 2015; **70**: 2133–43.
- 27** Gutiérrez-Gutiérrez B, Salamanca E, de Cueto M *et al*. Effect of appropriate combination therapy on mortality of patients with bloodstream infections due to carbapenemase-producing Enterobacteriaceae (INCREMENT): a retrospective cohort study. *Lancet Infect Dis* 2017; **17**: 726–34.
- 28** Karaiskos I, Antoniadou A, Giamarellou H. Combination therapy for extensively-drug resistant Gram-negative bacteria. *Expert Rev Anti Infect Ther* 2017; **15**: 1123–40.
- 29** Temkin E, Torre-Cisneros J, Beovic B *et al*. Ceftazidime-avibactam as salvage therapy for infections caused by carbapenem-resistant organisms. *Antimicrob Agents Chemother* 2017; **61**: e01964-16.
- 30** Tsolaki V, Mantzarlis K, Mpakalis A *et al*. Ceftazidime-avibactam to treat life-threatening infections by carbapenem-resistant pathogens in critically ill mechanically ventilated patients. *Antimicrob Agents Chemother* 2020; **64**: e02320-19.
- 31** Jorgensen SCJ, Trinh TD, Zasowski EJ *et al*. Real-world experience with ceftazidime-avibactam for multidrug-resistant Gram-negative bacterial infections. *Open Forum Infect Dis* 2019; **6**: ofz522.
- 32** Falcone M, Bassetti M, Tiseo G *et al*. Time to appropriate antibiotic therapy is a predictor of outcome in patients with bloodstream infection caused by KPC-producing *Klebsiella pneumoniae*. *Crit Care* 2020; **24**: 29.
- 33** Shields RK, Potoski BA, Haidar G *et al*. Clinical outcomes, drug toxicity, and emergence of ceftazidime-avibactam resistance among patients treated for carbapenem-resistant Enterobacteriaceae infections. *Clin Infect Dis* 2016; **63**: 1615–8.
- 34** Onorato L, Di Caprio G, Signoriello S *et al*. Efficacy of ceftazidime/avibactam in monotherapy or combination therapy against carbapenem-resistant Gram-negative bacteria: a meta-analysis. *Int J Antimicrob Agents* 2019; **54**: 735–40.
- 35** Fiore M, Alfieri A, Di Franco S *et al*. Ceftazidime-avibactam combination therapy compared to ceftazidime-avibactam monotherapy for the treatment of severe infections due to carbapenem-resistant pathogens: a systematic review and network meta-analysis. *Antibiotics (Basel)* 2020; **9**: 388.
- 36** Shields RK, Nguyen MH, Chen L *et al*. Pneumonia and renal replacement therapy are risk factors for ceftazidime-avibactam treatment failures and resistance among patients with carbapenem-resistant Enterobacteriaceae infections. *Antimicrob Agents Chemother* 2018; **62**: e02497-17.
- 37** Nicolau DP, Siew L, Armstrong J *et al*. Phase 1 study assessing the steady-state concentration of ceftazidime and avibactam in plasma and epithelial lining fluid following two dosing regimens. *J Antimicrob Chemother* 2015; **70**: 2862–9.
- 38** Torres A, Zhong N, Pacht J *et al*. Ceftazidime-avibactam versus meropenem in nosocomial pneumonia, including ventilator-associated pneumonia (REPROVE): a randomised, double-blind, phase 3 non-inferiority trial. *Lancet Infect Dis* 2018; **18**: 285–95.
- 39** Kazmierczak KM, Bradford PA, Stone GG *et al*. In vitro activity of ceftazidime-avibactam and aztreonam-avibactam against OXA-48-carrying Enterobacteriaceae isolated as part of the International Network for Optimal Resistance Monitoring (INFORM) global surveillance program from 2012 to 2015. *Antimicrob Agents Chemother* 2018; **62**: e00592-18.
- 40** Sousa A, Pérez-Rodríguez MT, Soto A *et al*. Effectiveness of ceftazidime/avibactam as salvage therapy for treatment of infections due to OXA-48 carbapenemase-producing Enterobacteriaceae. *J Antimicrob Chemother* 2018; **73**: 3170–5.
- 41** De la Calle C, Rodríguez O, Morata L *et al*. Clinical characteristics and prognosis of infections caused by OXA-48 carbapenemase-producing Enterobacteriaceae in patients treated with ceftazidime-avibactam. *Int J Antimicrob Agents* 2019; **53**: 520–4.
- 42** Shields RK, Nguyen MH, Press EG *et al*. In vitro selection of meropenem resistance among ceftazidime-avibactam-resistant, meropenem-susceptible *Klebsiella pneumoniae* isolates with variant KPC-3 carbapenemases. *Antimicrob Agents Chemother* 2017; **61**: e00079-17.
- 43** Galani I, Antoniadou A, Karaiskos I *et al*. Genomic characterization of a KPC-23-producing *Klebsiella pneumoniae* ST258 clinical isolate resistant to ceftazidime-avibactam. *Clin Microbiol Infect* 2019; **25**: 763.e5–8.
- 44** Shields RK, Chen L, Cheng S *et al*. Emergence of ceftazidime-avibactam resistance due to plasmid-borne *bla*<sub>KPC-3</sub> mutations during treatment of carbapenem-resistant *Klebsiella pneumoniae* infections. *Antimicrob Agents Chemother* 2017; **61**: e02097-16.
- 45** Gaibani P, Re MC, Campoli C *et al*. Bloodstream infection caused by KPC-producing *Klebsiella pneumoniae* resistant to ceftazidime/avibactam: epidemiology and genomic characterization. *Clin Microbiol Infect* 2020; **26**: 516.e1–4.
- 46** Galani I, Karaiskos I, Souli M *et al*. Outbreak of KPC-2-producing *Klebsiella pneumoniae* endowed with ceftazidime-avibactam resistance mediated through a VEB-1-mutant (VEB-25), Greece, September to October 2019. *Euro Surveill* 2020; **25**: pii=2000028.
